# Supplementary material for: The effects of Gd3+ substitution on the crystal structure, site symmetry, and photoluminescence of Y/Eu layered rare-earth hydroxide (LRH) nanoplates
Source: Royal Society of Chemistry journal article supplement (doi:10.1039/c1dt11332a), 2011-12-14
Supplement: c1dt11332a.pdf [file c1dt11332a.pdf]

## Electronic Supplementary Information

The effects of Gd<sup>3+</sup> substitution on the crystal structure, site symmetry, and photoluminescence of Y/Eu layered rare-earth hydroxide (LRH) nanoplates

Xiaoli Wu,<sup>a</sup> Ji-Guang Li,<sup>\*ab</sup> Qi Zhu,<sup>ab</sup> Jinkai Li,<sup>a</sup> Renzhi Ma,<sup>c</sup> Takayoshi Sasaki,<sup>c</sup>

Xiaodong Li,<sup>a</sup> Xudong Sun,<sup>a</sup> and Yoshio Sakka<sup>bc</sup>

<sup>a</sup>*Key Laboratory for Anisotropy and Texture of Materials (Ministry of Education),  
School of Materials and Metallurgy, Northeastern University, Shenyang, Liaoning  
110004, China*

<sup>b</sup>*Advanced Materials Processing Unit, National Institute for Materials Science, Sengen  
1-2-1, Tsukuba, Ibaraki 305-0047, Japan*

<sup>c</sup>*World Premier International Center for Materials Nanoarchitectonics (MANA),  
National Institute for Materials Science, Namiki 1-1, Tsukuba, Ibaraki 305-0044, Japan*

\*Corresponding author

Dr. Ji-Guang Li

National Institute for Materials Science

E-mail: [LI.Jiguang@nims.go.jp](mailto:LI.Jiguang@nims.go.jp)

Tel: +81-29-860-4394

### Chemical analysis of the LRH products:

The Y, Gd, and Eu contents of the hydrothermal products were analyzed by the inductively coupled plasma (ICP) technique (Aurora, Jarrell-Ash Co. Ltd., MA, USA) with an accuracy of 0.01wt%, and the NO<sub>3</sub><sup>-</sup> contents were assayed by the spectrophotometric method on a Ubest-35 spectrophotometer (Japan Spectroscopic Co. Ltd, Tokyo, Japan) with an experimental error of ±0.1 wt%. The average of three measurements was used to denote the content of the analyzed species, and the results are shown in Table 1.

**Table 1. Results of Elemental analysis of the (Y<sub>1-x</sub>Gd<sub>x</sub>Eu<sub>0.05</sub>)<sub>2</sub>(OH)<sub>5</sub>NO<sub>3</sub>·nH<sub>2</sub>O LRH samples**

| The <i>x</i> | Y (wt%) | Gd (wt%) | Eu (wt%) | NO <sub>3</sub> <sup>-</sup> (wt%) | Experimentally derived chemical formula                                                                                                            |
|--------------|---------|----------|----------|------------------------------------|----------------------------------------------------------------------------------------------------------------------------------------------------|
| 0.25         | 30.13   | 19.63    | 3.59     | 14.0                               | (Y <sub>0.72</sub> Gd <sub>0.26</sub> Eu <sub>0.05</sub> ) <sub>2</sub> (OH) <sub>5.22</sub> (NO <sub>3</sub> ) <sub>0.96</sub> ·nH <sub>2</sub> O |
| 0.50         | 18.89   | 37.22    | 3.76     | 13.6                               | (Y <sub>0.43</sub> Gd <sub>0.48</sub> Eu <sub>0.05</sub> ) <sub>2</sub> (OH) <sub>4.88</sub> (NO <sub>3</sub> ) <sub>0.88</sub> ·nH <sub>2</sub> O |
| 0.75         | 7.80    | 49.52    | 3.22     | 16.7                               | (Y <sub>0.21</sub> Gd <sub>0.74</sub> Eu <sub>0.05</sub> ) <sub>2</sub> (OH) <sub>4.74</sub> (NO <sub>3</sub> ) <sub>1.26</sub> ·nH <sub>2</sub> O |
| 0.95         | --      | 60.67    | 3.03     | 14.0                               | (Gd <sub>0.97</sub> Eu <sub>0.05</sub> ) <sub>2</sub> (OH) <sub>4.98</sub> (NO <sub>3</sub> ) <sub>1.14</sub> ·nH <sub>2</sub> O                   |

The amount of hydroxyls was derived based on molecular neutrality.
